# Supplementary material for: Low-Dose Dioxin Reduced Glucose Uptake in C2C12 Myocytes: The Role of Mitochondrial Oxidative Stress and Insulin-Dependent Calcium Mobilization
Source: MDPI journal article supplement (doi:10.3390/antiox11112109), 2022-10-26
Supplement: s1 [file s1]

## Supplementary Materials

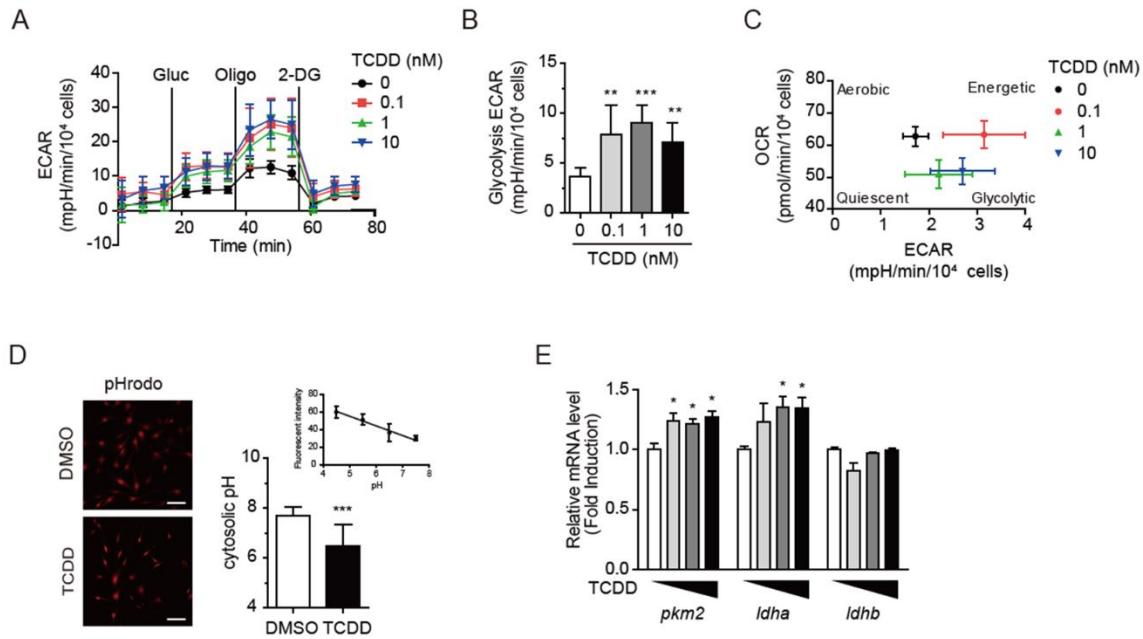

### Supplementary Figure S1. TCDD-induced glycolytic phenotype of muscle cells.

(A~C) Glycolysis stress test. C2C12 cells were incubated with TCDD (0, 0.1, 1, 10 nM) for 48 h. (A) Extracellular acidification rate (ECAR) profile. ECAR was analyzed using a Seahorse XF24 analyzer. Glucose (Gluc), Oligomycin (Oligo), and 2-deoxyglucose (2-DG) were consecutively injected to measure glycolytic function. (B) Changes in ECAR caused by glycolysis after adding 10 mM glucose are represented (glucose-induced ECAR – glucose-free ECAR). (C) Metabolic profile. OCRs and ECARs under basal conditions of Fig. 3A are plotted. (D) Cytosolic pH was measured using pHrodo. C2C12 cells were stained by pHrodo Red after incubation with DMSO or 100 pM TCDD for 48 h. The intensities from confocal microscope images (left panel) were calculated as cytosolic pH (lower right) according to the standard curve (upper right) ( $n \geq 19$ ). (E) Real-time qRT-PCR. The mRNA levels of pyruvate kinase (PKM2) and lactate dehydrogenase (LDHA and LDHB) relative to 18S rRNA depending on TCDD concentrations. The data are plotted as the mean  $\pm$  SEM ( $n \geq 3$ ). \* $p < 0.05$ , \*\* $p < 0.01$ , \*\*\* $p < 0.001$  vs. DMSO control.

**Supplementary Table S1.** The sources and working dilutions of antibodies used.

| Target         | Vendor                    | Cat. No.   | Dilution |
|----------------|---------------------------|------------|----------|
| AhR            | Enzo Life Sciences        | BML-SA210  | 1:1000   |
| Akt            | Santa Cruz Biotechnology  | sc-81434   | 1:2000   |
| pAkt (S473)    | Santa Cruz Biotechnology  | sc-514032  | 1:2000   |
| pAkt (T308)    | Santa Cruz Biotechnology  | sc-271966  | 1:2000   |
| GLUT4          | Novus Biologicals         | NBP2-22214 | 1:2000   |
| IRS-1          | Cell Signaling Technology | 2382S      | 1:2000   |
| pIRS-1 (S307)  | Santa Cruz Biotechnology  | sc-33956   | 1:1000   |
| pIRS-1 (Y632)  | Santa Cruz Biotechnology  | sc-17196-R | 1:1000   |
| IR $\beta$     | GeneTex                   | GTX101136  | 1:2000   |
| myc            | Santa Cruz Biotechnology  | sc-40      | 1:250    |
| NDUFA9         | Invitrogen                | 459100     | 1:3000   |
| SDHA           | Abcam                     | ab110410   | 1:3000   |
| UQCRC2         | Abcam                     | ab14745    | 1:3000   |
| COXIV          | Invitrogen                | A21348     | 1:3000   |
| ATP5 $\alpha$  | Abcam                     | ab110410   | 1:3000   |
| $\beta$ -actin | Santa Cruz Biotechnology  | sc-47778   | 1:3000   |

## **Supplementary Methods**

### **Glycolysis stress test**

Glycolytic phenotype of C2C12 cells were analyzed from extracellular acidification rate (ECAR) profile under glycolysis stress as reported [36]. ECAR is primarily a measure of lactate production which can be equal to glycolytic rate. C2C12 cells ( $1 \times 10^4$  cells/well) were seeded on XF-24 cell culture plate (Agilent Technologies) and incubated with glucose-free XF Base Medium (Agilent Technologies) at 37°C in a non-CO<sub>2</sub> incubator for an hour before the experiment. During the experiment, Glucose (10 mM), Oligomycin (1  $\mu$ M) and 2-DG (50 mM) were sequentially added to measure glycolysis, glycolytic capacity and reserve, respectively. ECAR was measured by XF-24 analyzer (Agilent Technologies, Santa Clara, CA, USA) and the changes in ECAR caused by addition of glucose ( $\text{ECAR}_{\text{glucose}} - \text{ECAR}_{\text{basal}}$ ) were used to compare glycolytic activity.

### **Measurement of intracellular pH**

Intracellular pH was monitored using pHrodo™ Red (Molecular Probes, Eugene, OR, USA) as manufacturer's instruction. C2C12 cells ( $1 \times 10^4$  cells) were incubated with DMSO or 100 pM TCDD for 48 h on confocal dishes. At a day of experiment, the cells were washed with Hank's Balanced Salt Solution (HBSS; 20 mM HEPES pH 7.4, 145 mM NaCl, 5 mM KCl, 1 mM MgCl<sub>2</sub>, 2 mM CaCl<sub>2</sub>, 5 mM D-glucose) and loaded with pHrodo™ Red at 37°C for 30 min. Images were acquired by confocal microscope, LSM700 (Carl Zeiss, Oberkochen, Germany) and standard curve to calculate intracellular pH was generated using Valinomycin (10  $\mu$ M) and Nigericin (10  $\mu$ M), which helps equilibrate the pH inside and outside of the cells, in pH calibration buffer (pH 4.5 – 7.5).
